# Supplementary material
Source: publisher figshare collection journal article supplement (https://acs.figshare.com/ndownloader/files/3865930)
Supplement: Supplementary file 1 [file 3865930]

**Supplementary Files for**  
**Simultaneous analysis of PhIP, 4-OH'-PhIP and their precursors using**  
**UHPLC-MS/MS**

Yan Yan, Mao-Mao Zeng, Zong-Ping Zheng, Zhi-Yong He, Guan-Jun Tao, Shuang

Zhang, Ya-Hui Gao, Jie Chen\*

**Figure S1.** Daughter scan of  $m/z$  383, glucose, electrospray in positive ion mode (collision energy 20 V) with daughter ion at  $m/z$  203.

**Figure S2.** Calibration curves of glucose (quadratic fits)

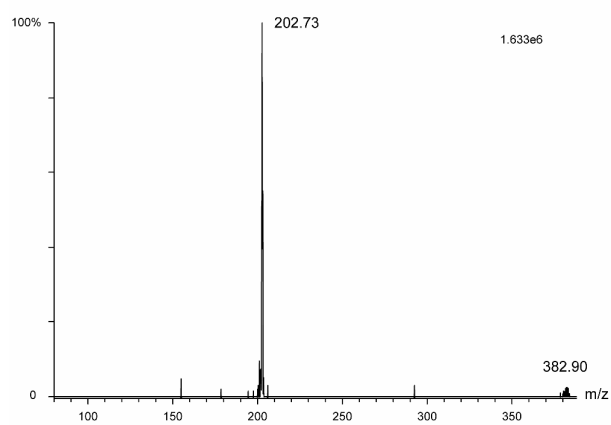

**Figure S1.** Daughter scan of m/z 383, glucose, electrospray in positive ion mode (collision energy 20 V) with daughter ion at m/z 203.

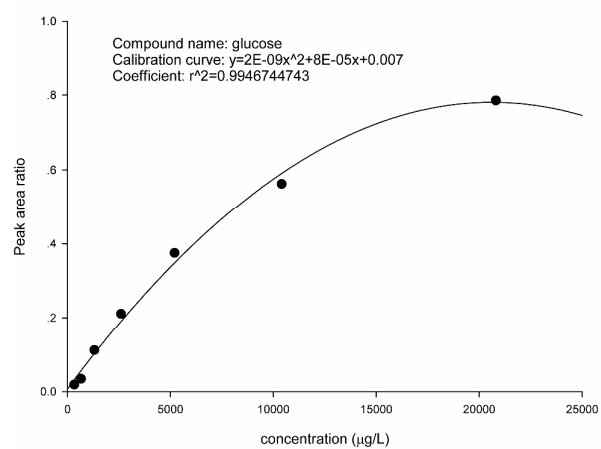

**Figure S2.** Calibration curves of glucose (quadratic fits)
